# Supplementary material for: MIS 5e sea-level history along the Pacific Coast of North America
Source: Copernicus journal article supplement (doi:10.5194/essd-2021-345), 2021-10-22
Supplement: Supplementary file [file essd-2021-345-RC2-supplement.zip]

# Summary of Comments on essd-2021-345 review.pdf

---

Page: 5

---

 Author: WEHMILLER      Subject: Sticky Note      Date: 10/27/2021 1:29:29 PM -04'00'  
delete "notice" and write "description to accompany"....

---

 Author: WEHMILLER      Subject: Sticky Note      Date: 10/27/2021 1:30:22 PM -04'00'  
change "of" to "or"

---



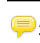

Author: WEHMILLER

Subject: Sticky Note

Date: 11/1/2021 3:50:38 PM -04'00'

do you need to change the name?

---

 Author: WEHMILLER      Subject: Sticky Note      Date: 11/2/2021 2:48:39 PM -04'00'  
Figure 36 shows the SNI data but text refers to Figure 37 - better check figure numbering

---

 Author: WEHMILLER      Subject: Sticky Note      Date: 11/1/2021 4:20:48 PM -04'00'  
fig 36b?

---

 Author: WEHMILLER      Subject: Sticky Note      Date: 11/2/2021 2:49:59 PM -04'00'  
I'm not a fan of the parabolic model, especially for the A/I values for the high terraces that are essentially at equilibrium. However, I agree that these model ages are simply that - model ages. We have similar estimates in the 1977 Open File and 1993 SEPM publications for the terraces in the 100-200 m range using different modeling approaches.

 Author: WEHMILLER      Subject: Sticky Note      Date: 11/1/2021 4:29:40 PM -04'00'  
We have AAR on the Linda Vista terrace

---



---

 Author: WEHMILLER      Subject: Sticky Note      Date: 11/1/2021 4:35:26 PM -04'00'

As I recall, the AA data for Saxidomus and Mya from Coquille and Cape Blanco are not inter-genericly consistent. You can't go into this issue here, but it's one of the nasty unresolved issues.
